# Supplementary material for: Hypoxia-induced epigenetic regulation of miR-485-3p promotes stemness and chemoresistance in pancreatic ductal adenocarcinoma via SLC7A11-mediated ferroptosis
Source: PubMed Central journal article supplement (PMC11137092; doi:10.1038/s41420-024-02035-x), 2024-05-29

**Fig. 2G**

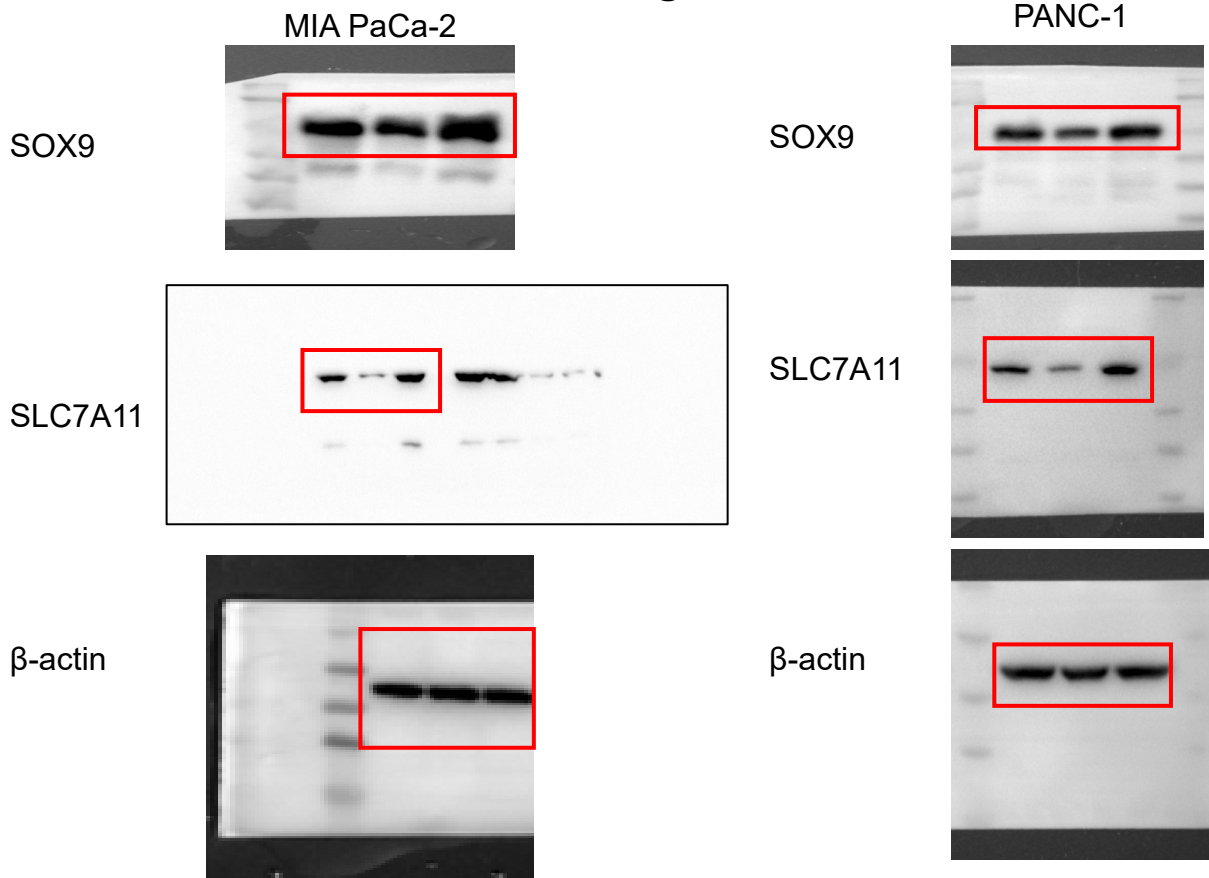

**Fig.2H**

MIA PaCa-2

PANC-1

HIF-1 $\alpha$

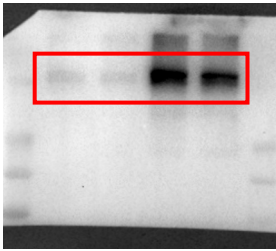

HIF-1 $\alpha$

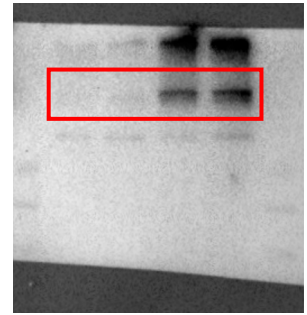

SOX9

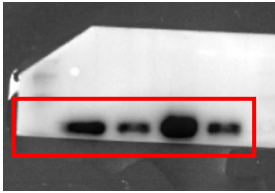

SOX9

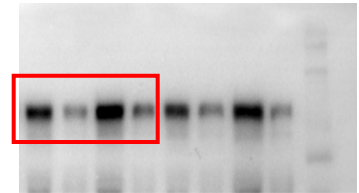

SLC7A11

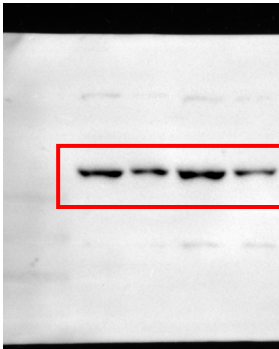

SLC7A11

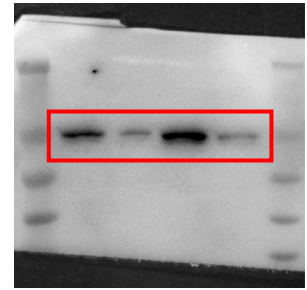

$\beta$ -actin

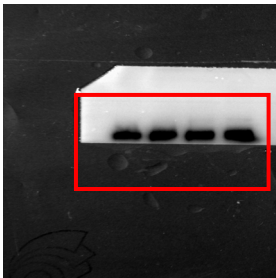

$\beta$ -actin

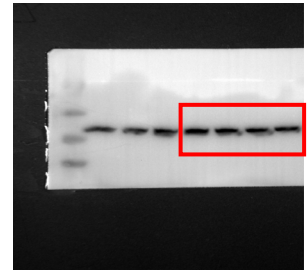

**Fig.5A**

MIA PaCa-2

PANC-1

SLC7A11

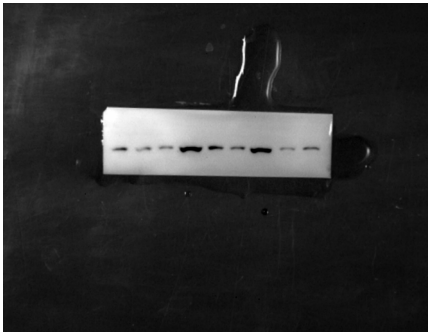

SLC7A11

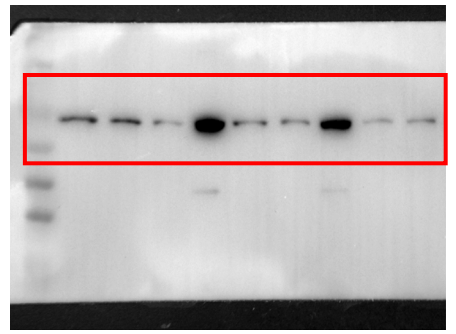

ALDH1A

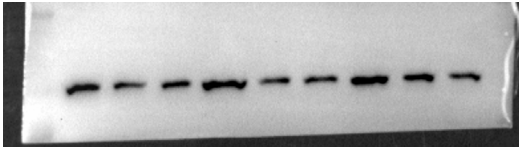

ALDH1A

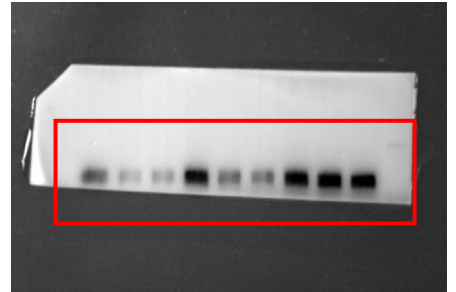

SOX2

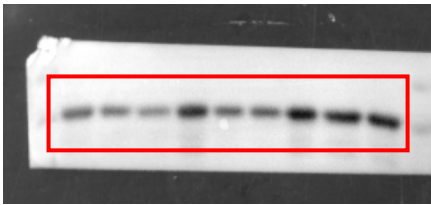

SOX2

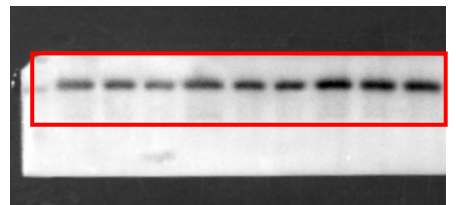

$\beta$ -actin

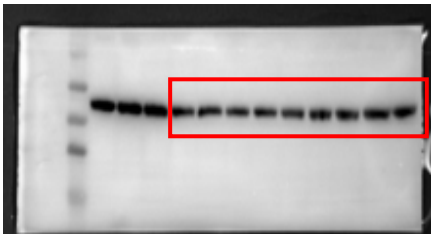

$\beta$ -actin

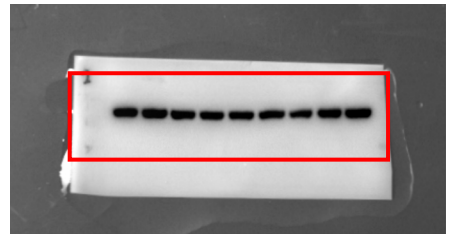

**Fig.6A**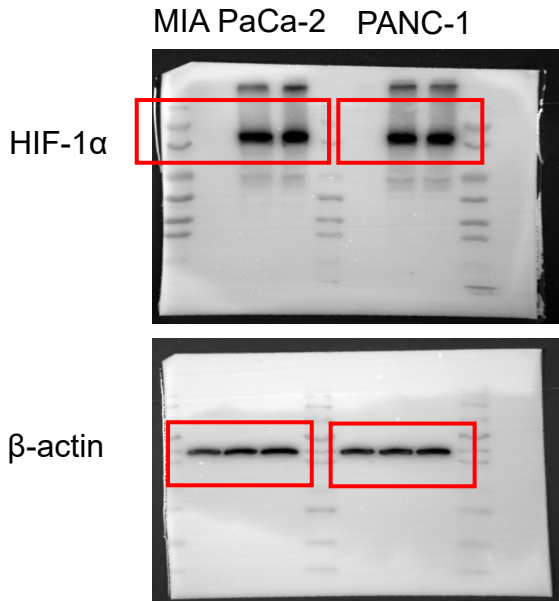**Fig.6B**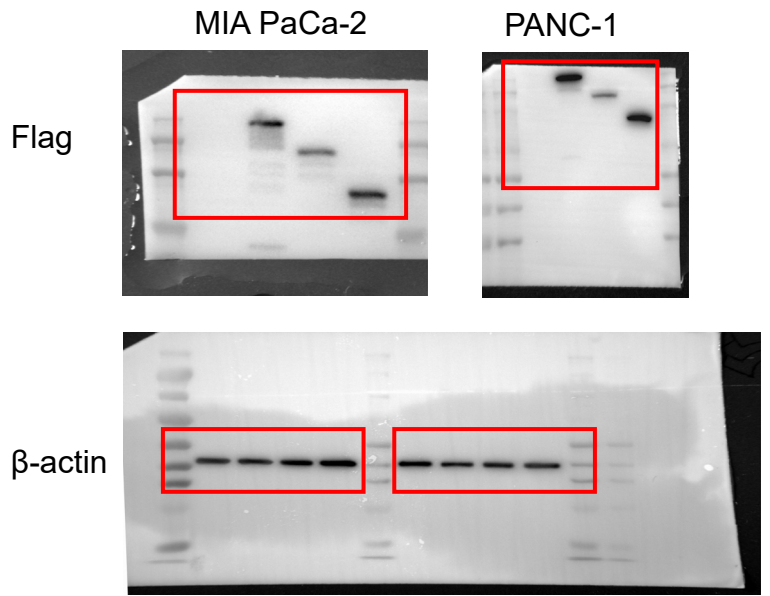**Fig.6C**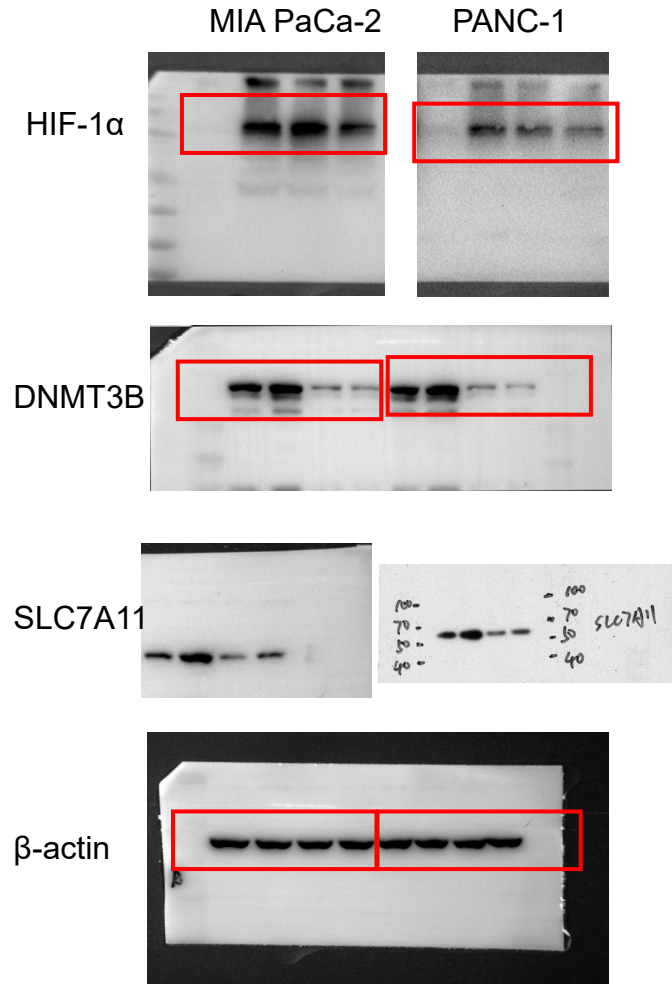**Fig.6D**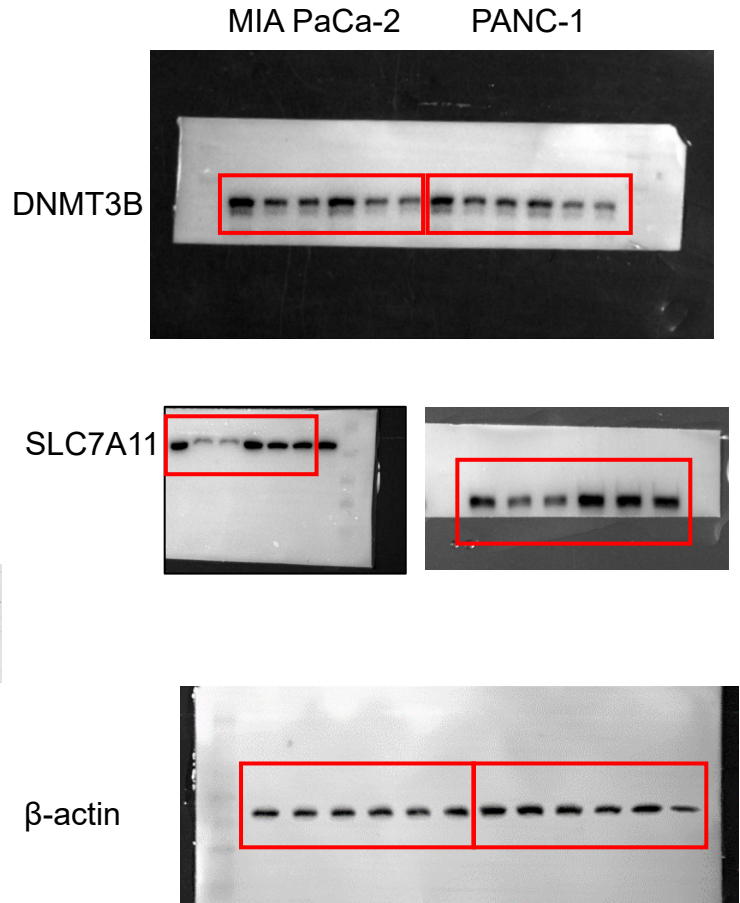



**Fig.7B**

MIA PaCa-2

PANC-1

DNMT3B

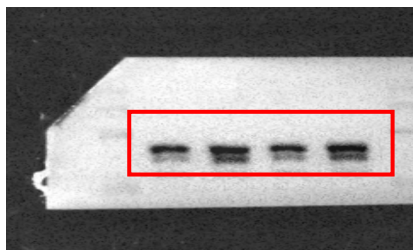

DNMT3B

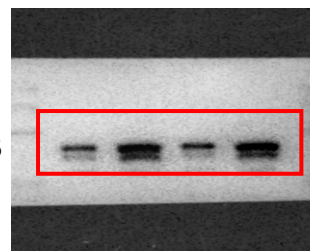

SOX9

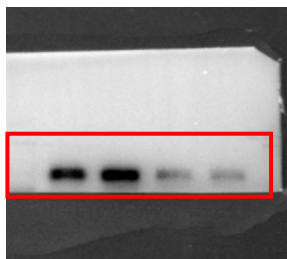

SOX9

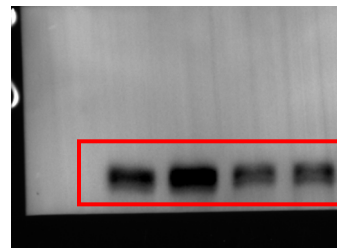

SLC7A11

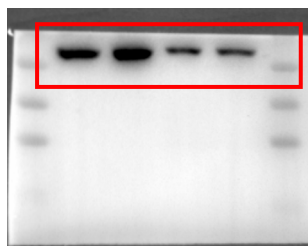

SLC7A11

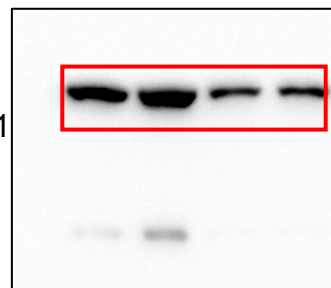

ALDH1A

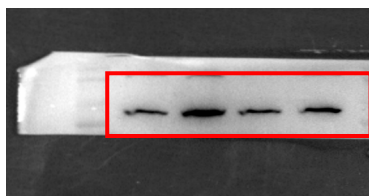

ALDH1A

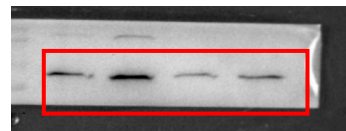

SOX2

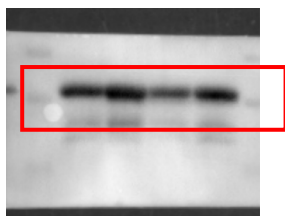

SOX2

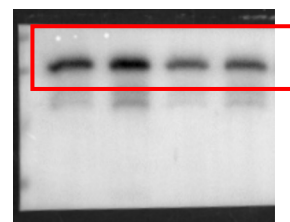

$\beta$ -actin

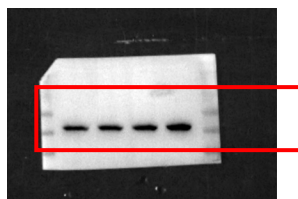

$\beta$ -actin

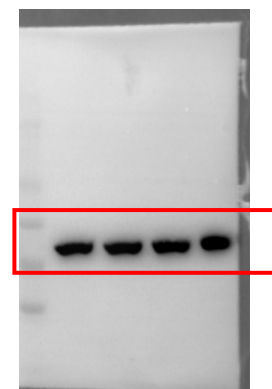

## Supplementary Fig. 1A

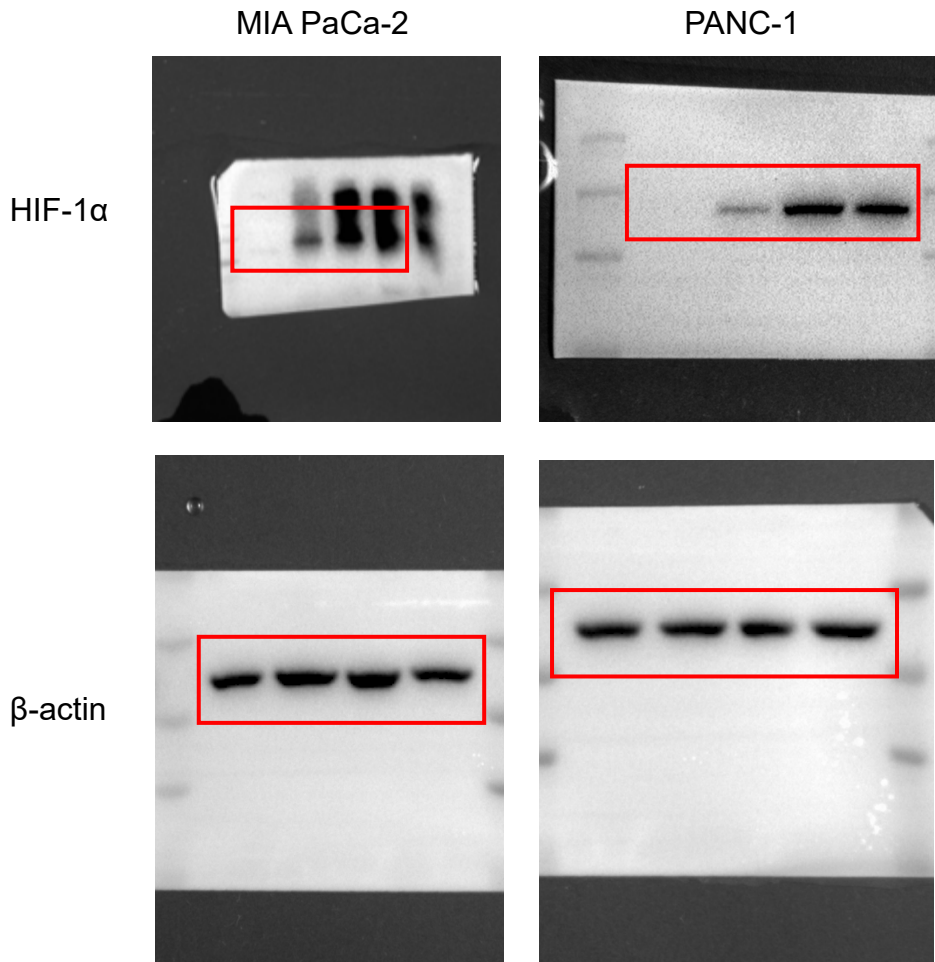

## Supplementary Fig. 1B

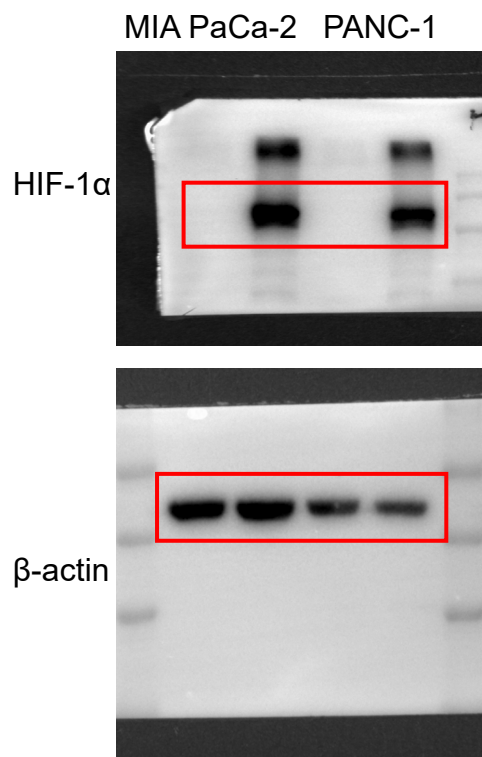

# Supplementary Fig. 4A    Supplementary Fig. 4B

MIA PaCa-2

PANC-1

HIF-1 $\alpha$

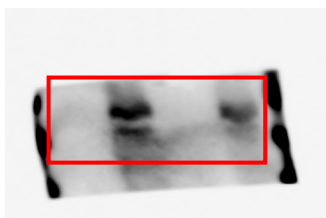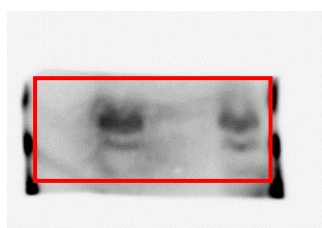

SOX9

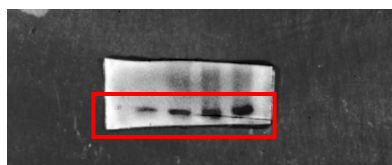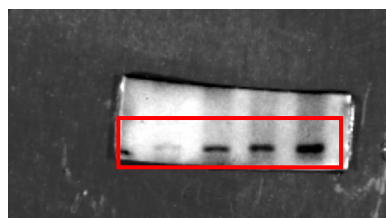

SLC7A11

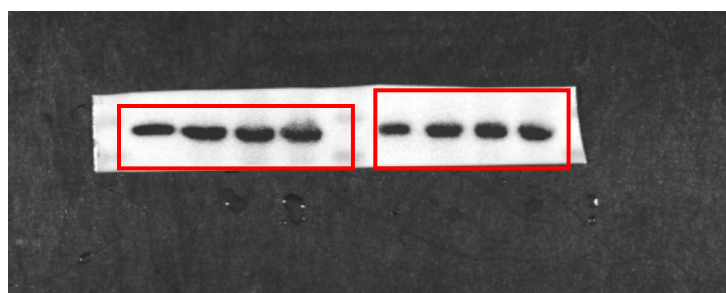

$\beta$ -actin

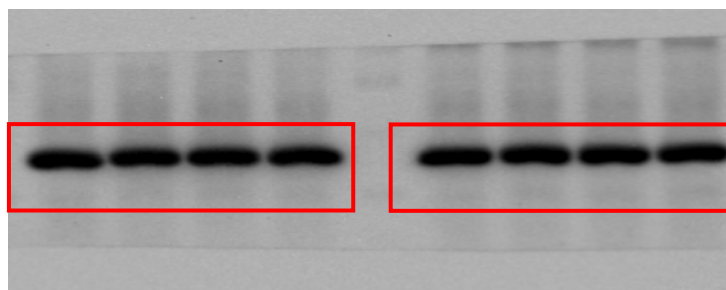

Supplementary Fig. 5A

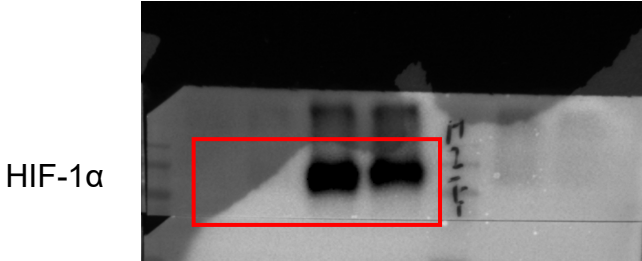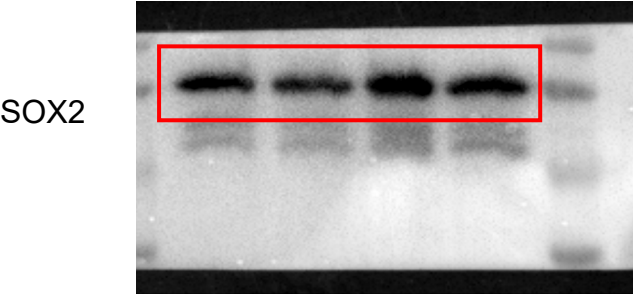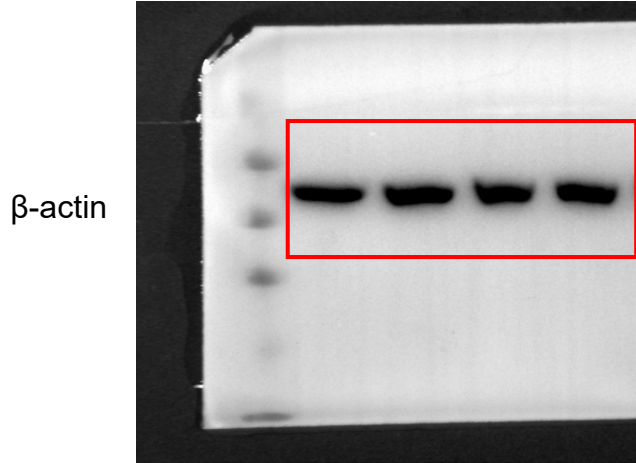

Supplementary Fig. 5B

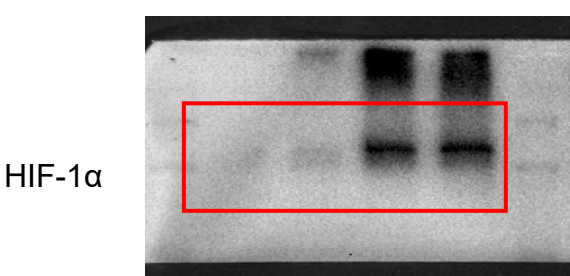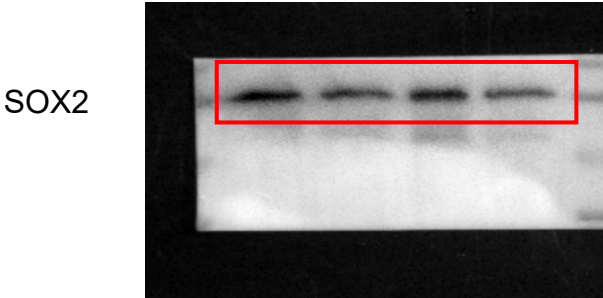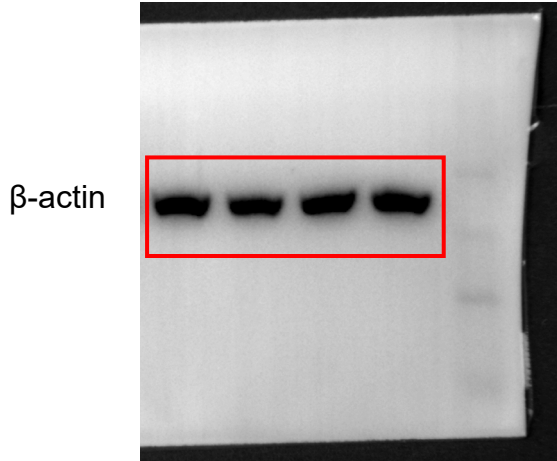

# Supplementary Fig. 9B

MIA PaCa-2

PANC-1

ACSL4

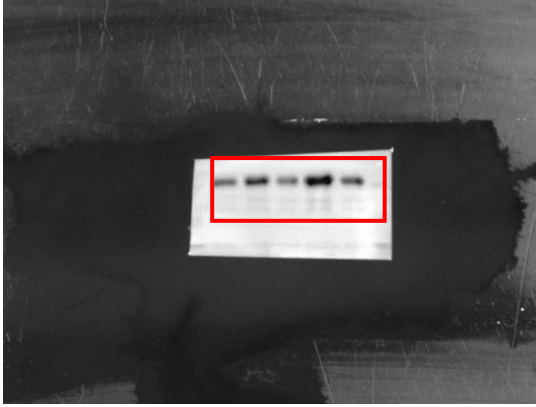

ACSL4

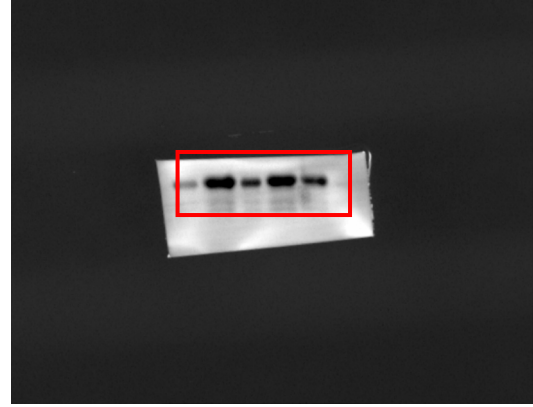

$\beta$ -actin

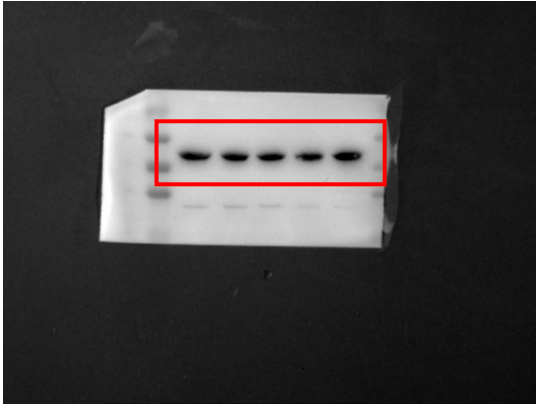

$\beta$ -actin

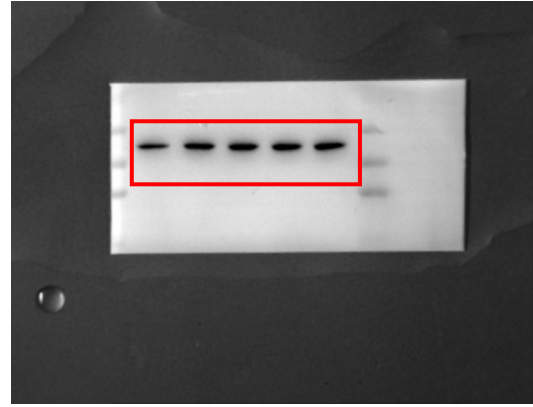

Supplement: 41420_2024_2035_MOESM14_ESM.pdf [file 41420_2024_2035_MOESM14_ESM.pdf]
